# Supplementary material
Source: PubMed Central journal article supplement (PMC6581230)
Supplement: jnm216796SupplementalData.pdf [file jnm216796SupplementalData.pdf]

**SUPPLEMENTAL FIGURE 1.**

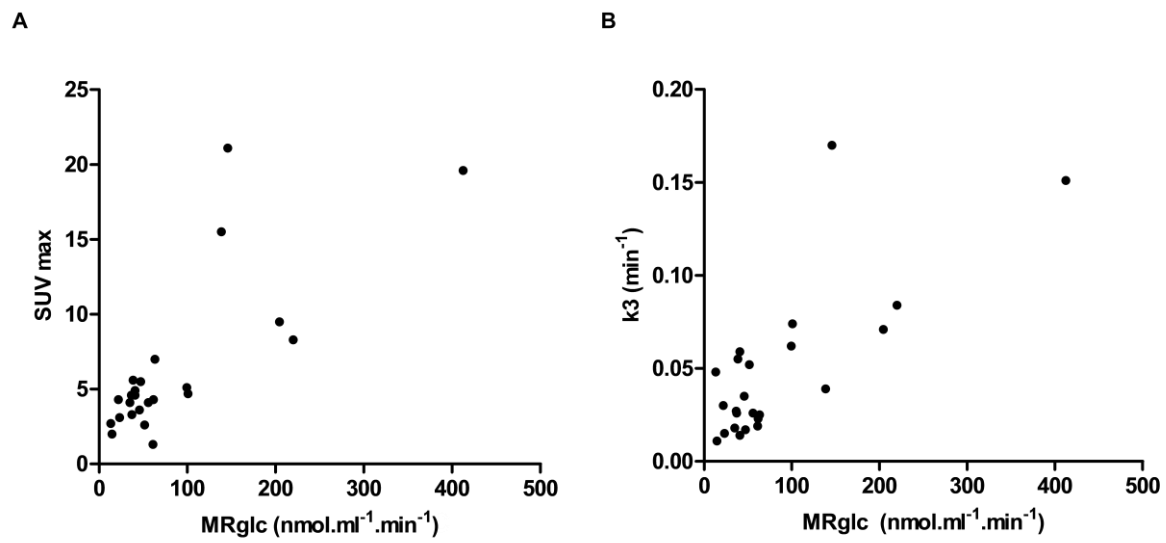

Scatter plots shows correlation between glucose metabolic rate (MR<sub>glc</sub>) and (A) maximum standardized uptake values (SUV<sub>max</sub>) and (B) the pharmacokinetic rate-constant k<sub>3</sub>

**SUPPLEMENTAL TABLE 1.**

**Supplemental table 1** <sup>18</sup>F-FDG Pharmacokinetic rate-constants for primary PPGLs

|                                                | <b>Hereditary cluster 1<br/>tumors (<i>SDHx</i>, <i>VHL</i>)<br/>(n = 4)</b> | <b>Hereditary cluster 2<br/>tumors (<i>RET</i>, <i>NF1</i>)<br/>(n = 6)</b> | <b>Sporadic tumors<br/>(n = 12)</b> |
|------------------------------------------------|------------------------------------------------------------------------------|-----------------------------------------------------------------------------|-------------------------------------|
| $K_1$ (ml.g <sup>-1</sup> .min <sup>-1</sup> ) | 0.26 (0.23 – 3.25)                                                           | 0.44 (0.23 – 0.65)                                                          | 0.48 (0.18 – 1.01)                  |
| $k_2$ (min <sup>-1</sup> )                     | 0.53 (0.13 – 2.82)                                                           | 1.08 (0.54 – 1.50)                                                          | 0.90 (0.47 – 1.49)                  |
| $k_3$ (min <sup>-1</sup> )                     | 0.095 (0.071 – 0.151) <sup>a</sup>                                           | 0.041 (0.015 – 0.062)                                                       | 0.255 (0.014 – 0.059) <sup>b</sup>  |
| $V_b$ (ml.ml <sup>-1</sup> )                   | 0.386 (0.149 – 0.738) <sup>a</sup>                                           | 0.105 (0.037 – 0.128) <sup>b</sup>                                          | 0.167 (0.072 – 0.300)               |

*Data are expressed as median (range). <sup>a</sup> and <sup>b</sup>: <sup>a</sup> Values are significantly higher than <sup>b</sup> values when indicated after unique values ( $P < 0.01$ , Kruskal Wallis with post-hoc Dunn's test). No significant differences were observed between other groups. Abbreviations:  $K_1$ - $k_3$ =rate-constants of the two-tissue compartment model of glucose metabolism,  $V_b$ =blood volume fraction.*
